# Supplementary material for: HSV-1 Glycoprotein D and Its Surface Receptors: Evaluation of Protein–Protein Interaction and Targeting by Triazole-Based Compounds through In Silico Approaches
Source: MDPI journal article supplement (doi:10.3390/ijms24087092), 2023-04-11
Supplement: s1 [file s1]

## Supporting information

# HSV-1 Glycoprotein D and its surface receptors: evaluation of protein-protein interaction and targeting by triazole-based compounds through in silico approaches

Roberta Bivacqua <sup>1</sup>, Isabella Romeo <sup>2,3,\*</sup>, Marilia Barreca <sup>1</sup>, Paola Barraja <sup>1</sup>, Stefano Alcaro <sup>2,3</sup> and Alessandra Montalbano <sup>1</sup>

<sup>1</sup> Dipartimento di Scienze e Tecnologie Biologiche Chimiche e Farmaceutiche (STEBICEF), Università degli Studi di Palermo, Via Archirafi 32, 90123 Palermo, Italy; roberta.bivacqua@unipa.it (R.B.), marilia.barreca@unipa.it (M.B.), alessandra.montalbano@unipa.it (A.M.), paola.barraja@unipa.it (P.B.).

<sup>2</sup> Dipartimento di Scienze della Salute, Università degli Studi “Magna Græcia” di Catanzaro, Campus “S. Venuta”, Viale Europa, 88100 Catanzaro, Italy; isabella.romeo@unicz.it (I.R.), alcaro@unicz.it (S.A.)

<sup>3</sup> Net4Science Academic Spin-Off, Università degli Studi “Magna Græcia” di Catanzaro, Campus “S. Venuta”, Viale Europa, 88100 Catanzaro, Italy; isabella.romeo@unicz.it (I.R.), alcaro@unicz.it (S.A.)

\*Correspondence: isabella.romeo@unicz.it

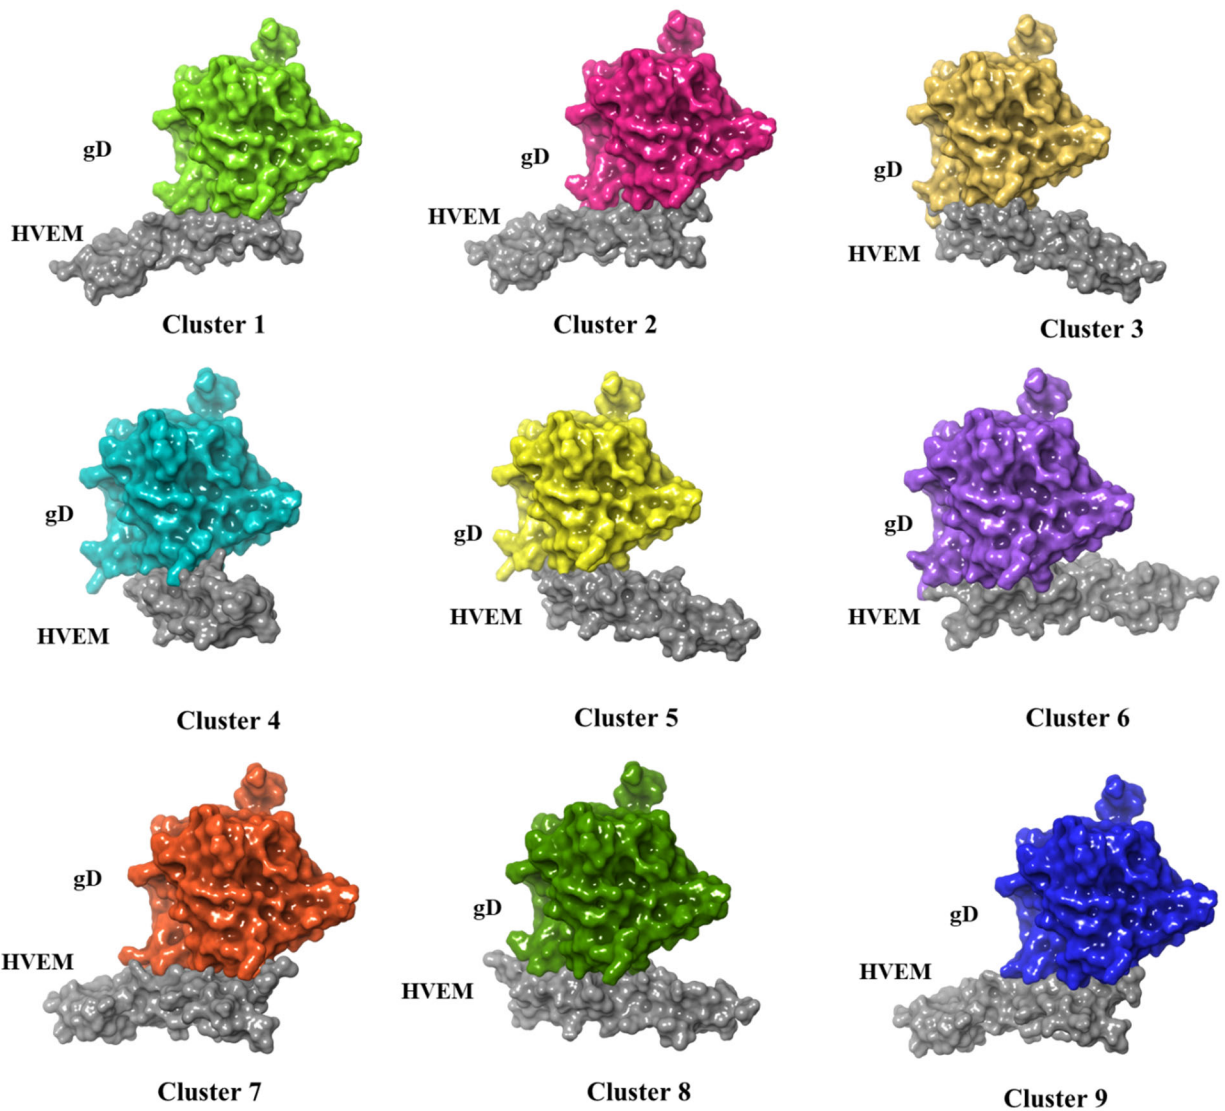

**Figure S1.** Surface representations of the clusters obtained by HADDOCK of HVEM (gray) in complex with gD (green, pink, faded orange, cyan, yellow, violet, orange, dark green and blue for cluster 1, 2, 3, 4, 5, 6, 7, 8 and 9 respectively).

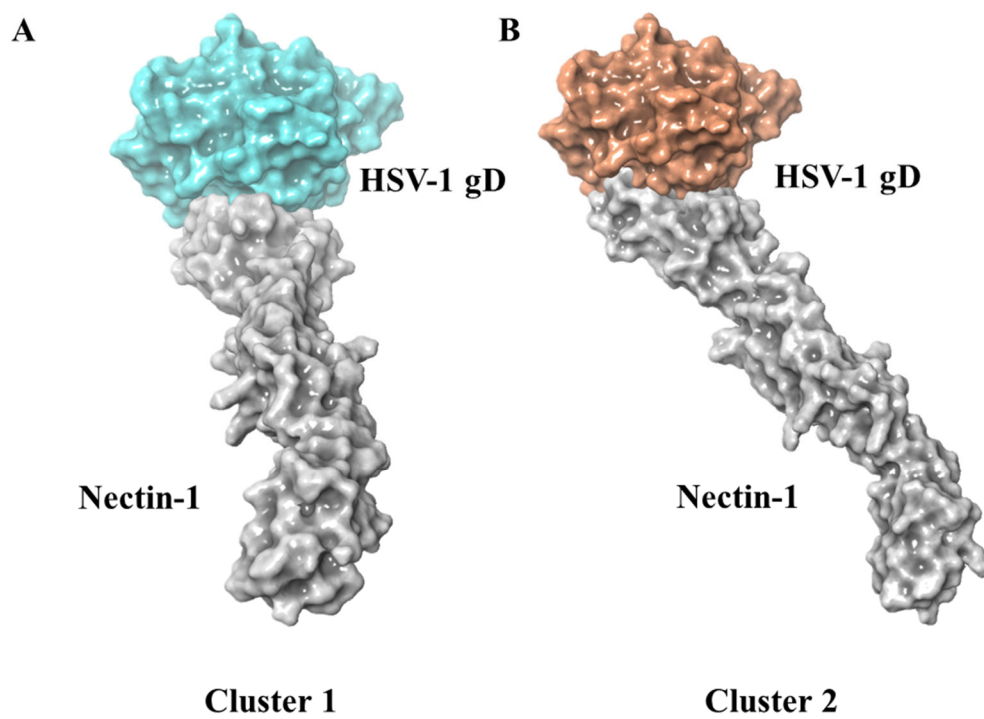

**Figure S2.** Surface representations of the clusters obtained by HADDOCK of Nectin-1 (gray) in complex with gD (cyan and orange for cluster 1 and 2, respectively).

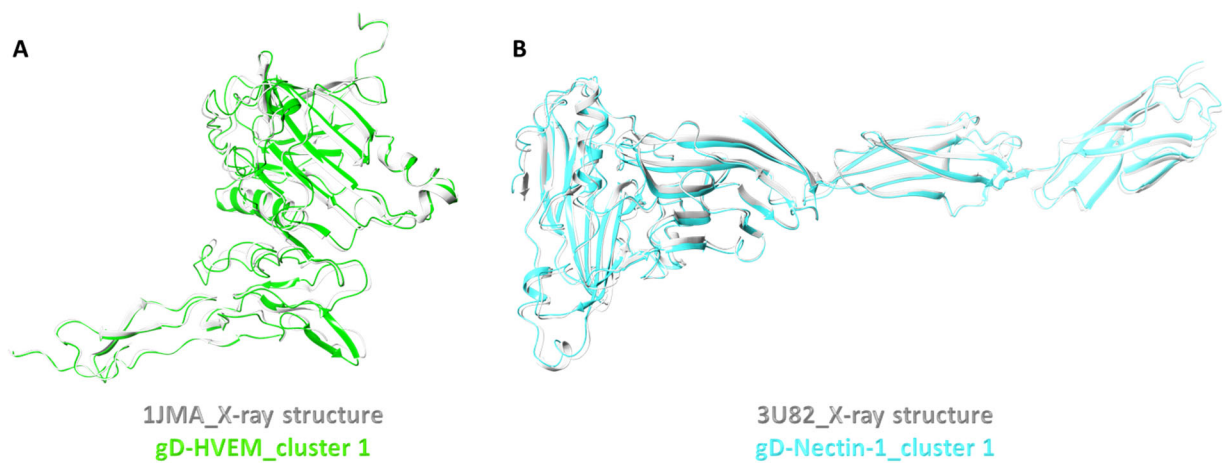

**Figure S3.** Superpositions between **A)** X-ray structure (PDB code:1JMA) and the obtained best docked pose of gD in complex with HVEM and **B)** X-ray structure (PDB code: 3U82) and the obtained best docked pose of gD in complex with Nectin-1.

**Table S1:** Matching frames (MF), total GBPM score (TotS), all frames GBPM average scores (AFAveS), and quartile distribution of the pivotal hotspots of gD in complex to HVEM in all frames of MDs.

| Residue | #MF | TotS      | AFAveS | Quartile |
|---------|-----|-----------|--------|----------|
| Ala12   | 922 | -6751.66  | -6.75  | Q1       |
| Asp13   | 197 | -2077.63  | -2.08  | Q1       |
| Asn15   | 337 | -3132.08  | -3.13  | Q1       |
| Asp26   | 264 | -1974.60  | -1.97  | Q1       |
| Gln27   | 911 | -5481.98  | -5.48  | Q1       |
| Thr29   | 938 | -10004.70 | -10.00 | Q1       |
| Gly33   | 607 | -1212.89  | -1.21  | Q1       |
| Arg35   | 921 | -14635.20 | -14.64 | Q1       |
| Lys10   | 22  | -205.12   | -0.21  | Q2       |
| Lys122  | 50  | -471.54   | -0.47  | Q2       |
| Pro14   | 34  | -301.83   | -0.30  | Q2       |
| Lys186  | 12  | -200.25   | -0.20  | Q2       |
| Gly19   | 4   | -66.18    | -0.07  | Q2       |
| Leu257  | 11  | -116.85   | -0.12  | Q2       |
| Arg64   | 22  | -196.39   | -0.20  | Q2       |
| Ala7    | 144 | -668.89   | -0.67  | Q2       |
| Phe17   | 1   | -6.81     | -0.01  | Q3       |
| Lys20   | 2   | -20.76    | -0.02  | Q3       |
| Leu25   | 1   | -34.69    | -0.03  | Q3       |
| Glu259  | 2   | -15.48    | -0.02  | Q3       |
| Asp30   | 8   | -61.83    | -0.06  | Q3       |
| Pro32   | 33  | -37.19    | -0.04  | Q3       |
| Ala5    | 4   | -39.94    | -0.04  | Q3       |
| Glu63   | 2   | -24.34    | -0.02  | Q3       |
| Met11   | 7   | -9.03     | -0.01  | Q4       |
| Arg18   | 7   | -13.35    | -0.01  | Q4       |
| Val24   | 1   | -0.75     | 0.00   | Q4       |
| Lys245  | 1   | -11.38    | -0.01  | Q4       |
| Ser258  | 1   | -5.38     | -0.01  | Q4       |
| Pro31   | 1   | -1.13     | 0.00   | Q4       |
| Val34   | 1   | -6.22     | -0.01  | Q4       |
| Leu4    | 3   | -3.50     | 0.00   | Q4       |

**Table S2:** Matching frames (MF), total GBPM score (TotS), all frames GBPM average scores (AFAveS), and quartile distribution of the pivotal hotspots of gD in complex to Nectin-1 in all frames of MDs.

| Residue | #MF | TotS     | AFAveS | Quartile |
|---------|-----|----------|--------|----------|
| Arg222  | 629 | -3607.74 | -1.80  | Q1       |
| Asp215  | 700 | -7474.12 | -3.74  | Q1       |
| Asp26   | 231 | -2012.72 | -1.01  | Q1       |
| Gln27   | 271 | -2260.99 | -1.13  | Q1       |
| Gly218  | 466 | -1946.57 | -0.97  | Q1       |
| Met219  | 324 | -2551.63 | -1.28  | Q1       |
| Pro221  | 672 | -3651.04 | -1.83  | Q1       |
| Ser200  | 344 | -3706.21 | -1.85  | Q1       |
| Tyr38   | 564 | -2184.27 | -1.09  | Q1       |
| Arg196  | 37  | -393.61  | -0.20  | Q2       |
| Arg64   | 149 | -1668.43 | -0.83  | Q2       |
| Gln132  | 126 | -801.80  | -0.40  | Q2       |
| Leu25   | 210 | -872.21  | -0.44  | Q2       |
| Lys186  | 140 | -1317.52 | -0.66  | Q2       |
| Pro23   | 90  | -460.35  | -0.23  | Q2       |
| Ser235  | 198 | -1272.31 | -0.64  | Q2       |
| Tyr137  | 39  | -336.19  | -0.17  | Q2       |
| Arg184  | 8   | -74.78   | -0.04  | Q3       |
| Asn136  | 4   | -59.69   | -0.03  | Q3       |
| Asp139  | 22  | -324.78  | -0.16  | Q3       |
| Pro199  | 9   | -62.42   | -0.03  | Q3       |
| Ser140  | 9   | -83.69   | -0.04  | Q3       |
| Ser216  | 23  | -150.97  | -0.08  | Q3       |
| Tyr234  | 116 | -294.13  | -0.15  | Q3       |
| Val24   | 17  | -100.52  | -0.05  | Q3       |
| Ala185  | 2   | -11.58   | -0.01  | Q4       |
| Arg36   | 5   | -11.36   | -0.01  | Q4       |
| Asn227  | 2   | -5.78    | 0.00   | Q4       |
| Ile217  | 6   | -35.01   | -0.02  | Q4       |
| Lys190  | 7   | -38.02   | -0.02  | Q4       |
| Phe223  | 2   | -3.06    | 0.00   | Q4       |
| Thr230  | 9   | -22.23   | -0.01  | Q4       |

|        |    |        |       |    |
|--------|----|--------|-------|----|
| Val231 | 24 | -47.55 | -0.02 | Q4 |
| Val37  | 12 | -23.35 | -0.01 | Q4 |

---

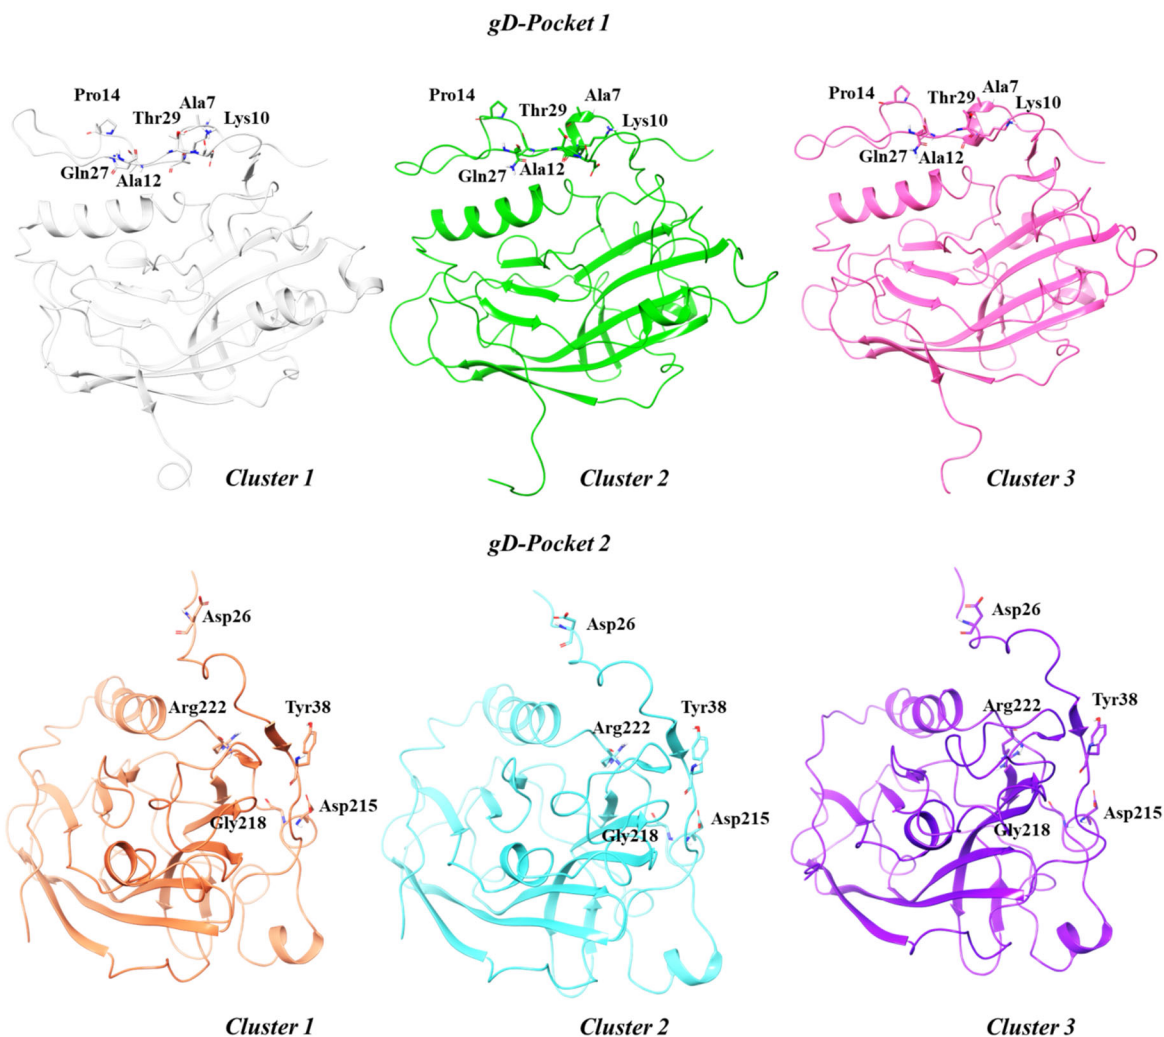

**Figure S4.** 3D structures of the six representative clusters generated by Desmond Trajectory clustering, after 100 ns of the gD-HVEM (gD-Pocket 1) and gD-Nectin-1 (gD-Pocket 2) MDs. Each structure is represented in cartoon form. The residues involved in crucial contacts with the investigated human receptors, such as HVEM for Pocket 1 and Nectin-1 for Pocket 2, are depicted as carbon sticks.



**Table S3.** Glide docking score (G-Score) values of 85 compounds against Cluster 1, 2 and 3 for both Pocket 1 and Pocket 2. The compounds are in numerical order. The G-score values are reported in kcal/mol.

| Cpd | Pocket 1  |           |           |                      | Pocket 2  |           |           |                      |
|-----|-----------|-----------|-----------|----------------------|-----------|-----------|-----------|----------------------|
|     | Cluster 1 | Cluster 2 | Cluster 3 | Average Gscore value | Cluster 1 | Cluster 2 | Cluster 3 | Average Gscore value |
| 1   | -4.796    | -3.718    | -4.174    | -4.229               | -5.589    | -4.899    | -4.927    | -5.138               |
| 2   | -4.727    | -3.806    | -3.880    | -4.138               | -4.740    | -4.722    | -4.278    | -4.580               |
| 3   | -4.999    | -3.761    | -4.274    | -4.345               | -4.988    | -4.636    | -4.569    | -4.731               |
| 4   | -4.524    | -3.915    | -3.773    | -4.071               | -4.866    | -4.959    | -4.611    | -4.812               |
| 5   | -4.561    | -3.435    | -3.823    | -3.940               | -5.255    | -4.913    | -4.443    | -4.870               |
| 6   | -4.544    | -3.390    | -3.142    | -3.692               | -4.641    | -4.831    | -4.038    | -4.503               |
| 7   | -4.924    | -2.881    | -4.160    | -3.988               | -4.663    | -4.385    | -4.086    | -4.378               |
| 8   | -4.559    | -3.052    | -2.927    | -3.513               | -4.748    | -4.817    | -4.478    | -4.681               |
| 9   | -5.007    | -3.194    | -3.361    | -3.854               | -4.502    | -4.328    | -4.132    | -4.321               |
| 10  | -4.432    | -3.195    | -3.063    | -3.563               | -4.193    | -3.404    | -3.960    | -3.852               |
| 11  | -4.592    | -2.958    | -3.071    | -3.540               | -5.059    | -4.160    | -3.649    | -4.289               |
| 12  | -4.415    | -2.081    | -3.075    | -3.190               | -4.812    | -4.725    | -4.344    | -4.627               |
| 13  | -6.268    | -3.723    | -3.919    | -4.637               | -5.785    | -4.882    | -4.877    | -5.181               |
| 14  | -6.125    | -4.623    | -5.472    | -5.407               | -6.281    | -5.619    | -5.288    | -5.729               |
| 15  | -6.302    | -3.631    | -3.641    | -4.525               | -5.536    | -4.826    | -5.029    | -5.130               |
| 16  | -6.271    | -4.460    | -5.460    | -5.397               | -5.947    | -5.105    | -5.303    | -5.452               |
| 17  | -5.921    | -3.082    | -3.574    | -4.192               | -5.168    | -5.106    | -4.549    | -4.941               |
| 18  | -4.802    | -4.112    | -4.791    | -4.568               | -5.509    | -5.257    | -4.727    | -5.164               |
| 19  | -4.807    | -3.829    | -4.033    | -4.223               | -4.402    | -4.453    | -4.381    | -4.412               |
| 20  | -4.538    | -2.943    | -3.690    | -3.724               | -4.618    | -4.215    | -4.024    | -4.286               |
| 21  | -4.726    | -3.712    | -3.967    | -4.135               | -4.850    | -4.595    | -4.245    | -4.563               |
| 22  | -5.005    | -3.884    | -4.349    | -4.413               | -4.935    | -3.467    | -4.433    | -4.278               |
| 23  | -4.780    | -3.405    | -4.292    | -4.159               | -5.320    | -4.494    | -5.101    | -4.972               |
| 24  | -4.807    | -3.205    | -4.141    | -4.051               | -4.869    | -4.128    | -4.355    | -4.451               |
| 25  | -4.409    | -3.170    | -3.894    | -3.824               | -4.975    | -4.622    | -4.841    | -4.813               |

|    |        |        |        |        |        |        |        |        |
|----|--------|--------|--------|--------|--------|--------|--------|--------|
| 26 | -5.036 | -3.389 | -3.418 | -3.948 | -5.018 | -4.731 | -4.434 | -4.728 |
| 27 | -4.670 | -3.068 | -4.170 | -3.969 | -4.492 | -4.735 | -4.085 | -4.437 |
| 28 | -4.923 | -3.436 | -4.386 | -4.248 | -4.867 | -4.248 | -4.021 | -4.379 |
| 29 | -4.658 | -3.266 | -4.100 | -4.008 | -4.578 | -4.196 | -3.852 | -4.209 |
| 30 | -4.672 | -3.794 | -3.323 | -3.930 | -4.830 | -4.671 | -3.962 | -4.488 |
| 31 | -4.336 | -3.478 | -3.133 | -3.649 | -4.439 | -4.407 | -3.627 | -4.158 |
| 32 | -4.559 | -3.705 | -3.090 | -3.785 | -4.679 | -4.604 | -4.003 | -4.429 |
| 33 | -4.827 | -3.835 | -3.310 | -3.991 | -4.735 | -3.806 | -3.962 | -4.168 |
| 34 | -4.778 | -3.538 | -3.706 | -4.007 | -4.647 | -4.641 | -4.872 | -4.720 |
| 35 | -4.449 | -3.115 | -3.768 | -3.777 | -4.762 | -4.473 | -3.989 | -4.408 |
| 36 | -4.756 | -2.473 | -3.356 | -3.528 | -4.671 | -4.567 | -4.182 | -4.473 |
| 37 | -4.878 | -2.342 | -3.027 | -3.416 | -4.704 | -4.688 | -4.296 | -4.563 |
| 38 | -4.522 | -2.678 | -3.973 | -3.724 | -4.602 | -4.128 | -4.056 | -4.262 |
| 39 | -5.005 | -2.958 | -3.336 | -3.766 | -4.117 | -4.373 | -4.040 | -4.177 |
| 40 | -4.544 | -2.842 | -3.322 | -3.569 | -4.046 | -4.079 | -3.737 | -3.954 |
| 41 | -4.514 | -3.130 | -2.847 | -3.497 | -4.885 | -3.603 | -3.725 | -4.071 |
| 42 | -4.171 | -2.522 | -2.657 | -3.117 | -3.505 | -3.105 | -3.220 | -3.277 |
| 43 | -4.362 | -2.897 | -2.833 | -3.364 | -4.039 | -3.830 | -3.631 | -3.833 |
| 44 | -4.589 | -2.828 | -3.331 | -3.583 | -4.029 | -3.476 | -3.773 | -3.759 |
| 45 | -4.545 | -3.877 | -3.672 | -4.031 | -4.297 | -4.091 | -4.379 | -4.256 |
| 46 | -4.324 | -2.628 | -2.951 | -3.301 | -4.913 | -3.316 | -3.378 | -3.869 |
| 47 | -4.564 | -2.521 | -3.022 | -3.369 | -4.004 | -3.781 | -3.530 | -3.772 |
| 48 | -4.602 | -2.227 | -2.958 | -3.262 | -4.525 | -3.401 | -3.424 | -3.783 |
| 49 | -4.321 | -1.719 | -3.446 | -3.162 | -5.148 | -4.228 | -3.702 | -4.359 |
| 50 | -4.592 | -2.726 | -3.032 | -3.450 | -3.918 | -3.406 | -3.215 | -3.513 |
| 51 | -4.503 | -2.260 | -2.847 | -3.203 | -3.737 | -3.404 | -3.665 | -3.602 |
| 52 | -4.507 | -3.362 | -2.714 | -3.528 | -4.617 | -4.867 | -4.160 | -4.548 |
| 53 | -4.555 | -3.982 | -3.868 | -4.135 | -4.870 | -5.027 | -4.060 | -4.652 |
| 54 | -4.573 | -3.633 | -3.878 | -4.028 | -4.171 | -4.657 | -3.585 | -4.138 |
| 55 | -4.843 | -3.621 | -3.949 | -4.138 | -4.110 | -4.035 | -4.095 | -4.080 |
| 56 | -4.650 | -3.560 | -4.083 | -4.098 | -4.155 | -3.870 | -4.313 | -4.113 |

|    |        |        |        |        |        |        |        |        |
|----|--------|--------|--------|--------|--------|--------|--------|--------|
| 57 | -4.393 | -3.246 | -3.465 | -3.701 | -4.239 | -3.731 | -3.950 | -3.973 |
| 58 | -4.625 | -3.475 | -3.817 | -3.972 | -4.668 | -4.676 | -4.233 | -4.526 |
| 59 | -4.759 | -2.992 | -3.983 | -3.911 | -4.292 | -3.796 | -4.063 | -4.050 |
| 60 | -4.688 | -3.053 | -3.769 | -3.837 | -4.432 | -4.424 | -4.778 | -4.545 |
| 61 | -4.363 | -3.477 | -3.934 | -3.925 | -3.966 | -4.056 | -3.973 | -3.998 |
| 62 | -4.830 | -3.340 | -3.108 | -3.759 | -4.300 | -4.214 | -4.417 | -4.310 |
| 63 | -4.890 | -3.471 | -2.878 | -3.746 | -4.691 | -4.837 | -4.065 | -4.531 |
| 64 | -4.571 | -3.556 | -3.994 | -4.040 | -5.266 | -4.068 | -4.047 | -4.460 |
| 65 | -4.756 | -3.454 | -4.216 | -4.142 | -4.180 | -3.903 | -3.912 | -3.998 |
| 66 | -4.463 | -3.131 | -3.919 | -3.838 | -4.204 | -3.631 | -3.605 | -3.813 |
| 67 | -4.592 | -3.824 | -3.040 | -3.819 | -4.848 | -4.876 | -4.553 | -4.759 |
| 68 | -4.699 | -3.480 | -3.888 | -4.022 | -4.869 | -4.926 | -4.189 | -4.661 |
| 69 | -4.766 | -3.609 | -3.825 | -4.067 | -4.320 | -3.737 | -4.360 | -4.139 |
| 70 | -4.931 | -3.701 | -4.017 | -4.216 | -4.280 | -4.470 | -4.350 | -4.367 |
| 71 | -4.973 | -3.767 | -4.178 | -4.306 | -4.049 | -4.812 | -4.415 | -4.425 |
| 72 | -4.608 | -3.411 | -3.790 | -3.936 | -4.041 | -4.496 | -4.036 | -4.191 |
| 73 | -4.812 | -3.767 | -4.115 | -4.231 | -4.124 | -4.750 | -4.252 | -4.375 |
| 74 | -4.914 | -3.817 | -4.082 | -4.271 | -4.372 | -3.711 | -4.121 | -4.068 |
| 75 | -4.718 | -3.472 | -4.151 | -4.114 | -5.354 | -4.604 | -4.844 | -4.934 |
| 76 | -4.742 | -3.325 | -4.014 | -4.027 | -4.629 | -4.550 | -4.424 | -4.534 |
| 77 | -4.879 | -2.742 | -2.914 | -3.512 | -4.779 | -4.793 | -4.691 | -4.754 |
| 78 | -4.932 | -3.357 | -3.315 | -3.868 | -4.760 | -4.706 | -4.083 | -4.516 |
| 79 | -4.674 | -3.316 | -4.078 | -4.023 | -4.264 | -4.710 | -4.125 | -4.366 |
| 80 | -4.891 | -3.387 | -4.404 | -4.227 | -4.136 | -4.546 | -4.027 | -4.236 |
| 81 | -4.642 | -3.206 | -4.021 | -3.956 | -3.681 | -4.326 | -3.742 | -3.916 |
| 82 | -6.087 | -3.423 | -3.668 | -4.393 | -5.478 | -4.877 | -4.782 | -5.046 |
| 83 | -6.113 | -4.422 | -5.268 | -5.268 | -6.070 | -5.597 | -5.104 | -5.590 |
| 84 | -6.308 | -3.533 | -3.753 | -4.531 | -5.588 | -4.830 | -4.773 | -5.064 |
| 85 | -6.182 | -4.523 | -5.407 | -5.371 | -5.980 | -5.121 | -5.240 | -5.447 |

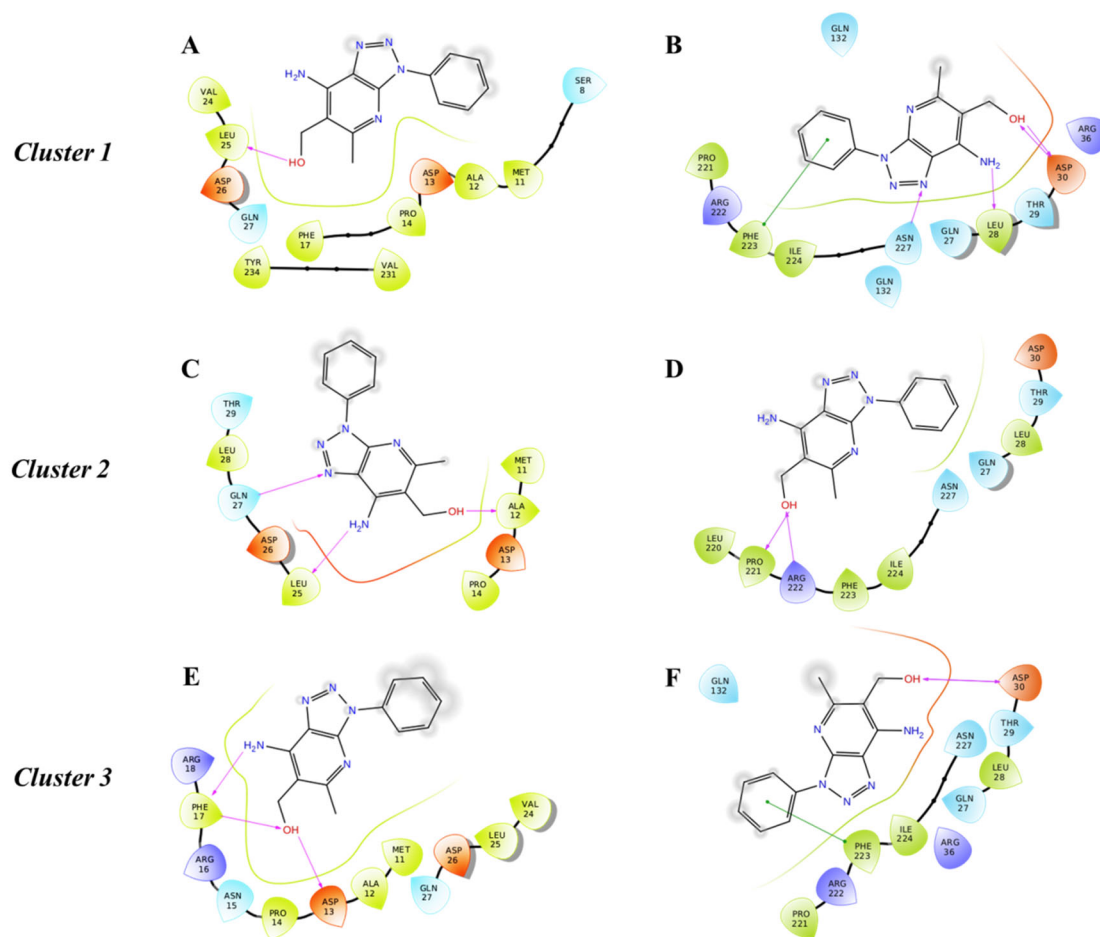

**Figure S5.** 2D Ligand Interaction diagram of **14** in complex to **A)** cluster 1, **C)** cluster 2, **E)** cluster 3 of gD-Pocket 1, and **14** in complex to **B)** cluster 1, **D)** cluster 2, **F)** cluster 3 of gD-Pocket 2.

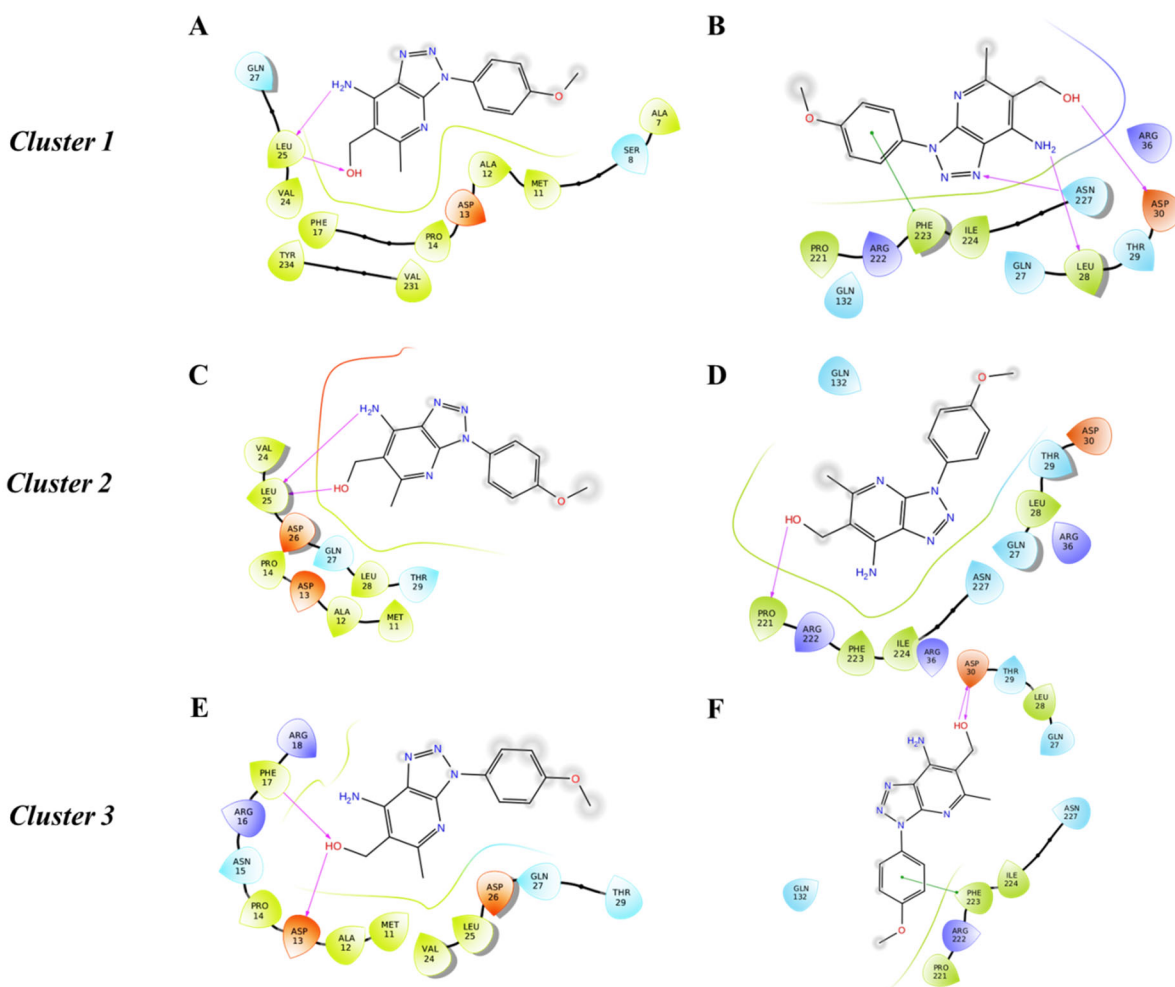

**Figure S6.** 2D Ligand Interaction diagram of **16** in complex to **A)** cluster 1, **C)** cluster 2, **E)** cluster 3 of gD-Pocket 1, and **16** in complex to **B)** cluster 1, **D)** cluster 2, **F)** cluster 3 of gD-Pocket 2.

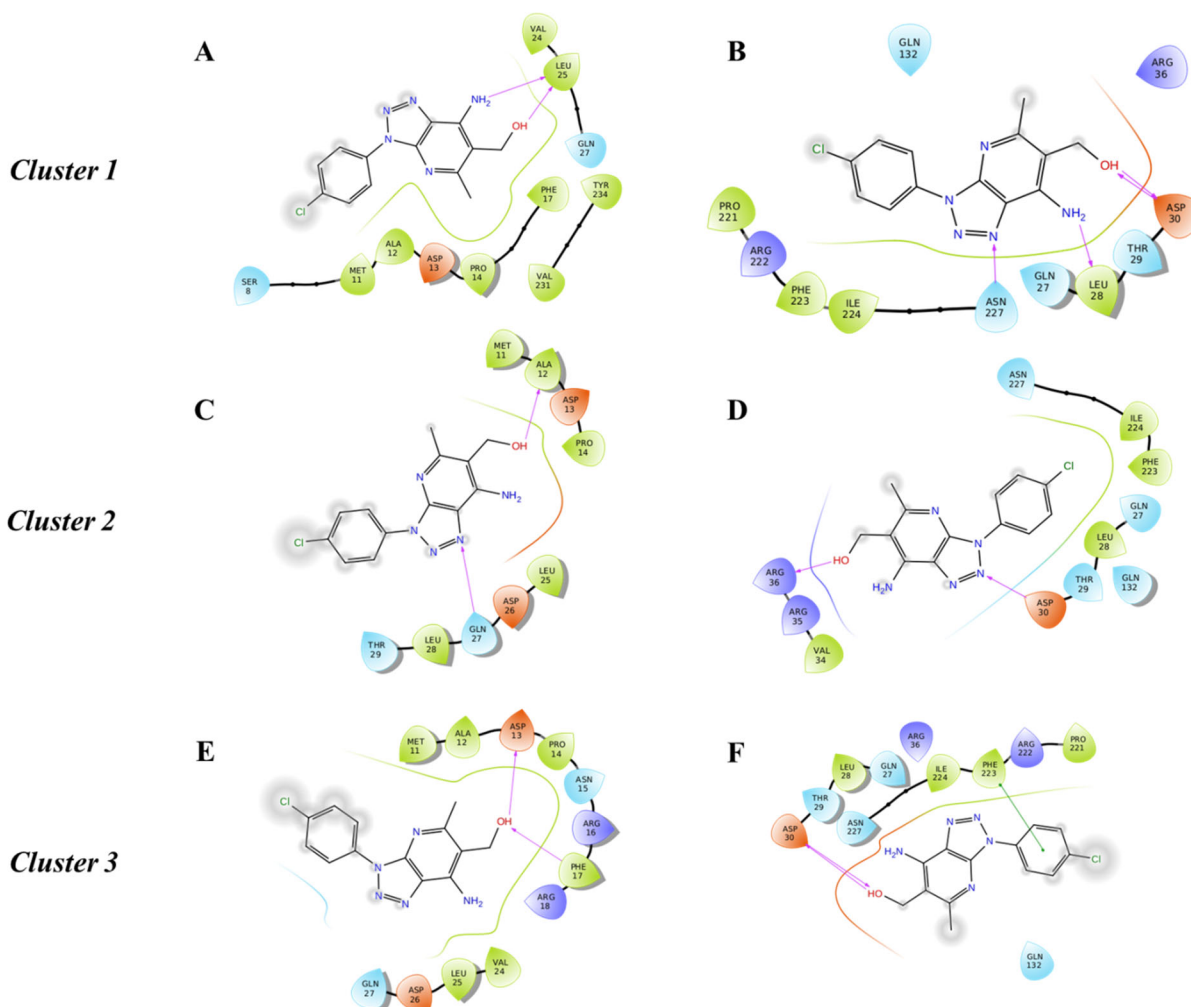

**Figure S7.** 2D Ligand Interaction diagram of **83** in complex to **A)** cluster 1, **C)** cluster 2, **E)** cluster 3 of gD-Pocket 1, and **83** in complex to **B)** cluster 1, **D)** cluster 2, **F)** cluster 3 of gD-Pocket 2.

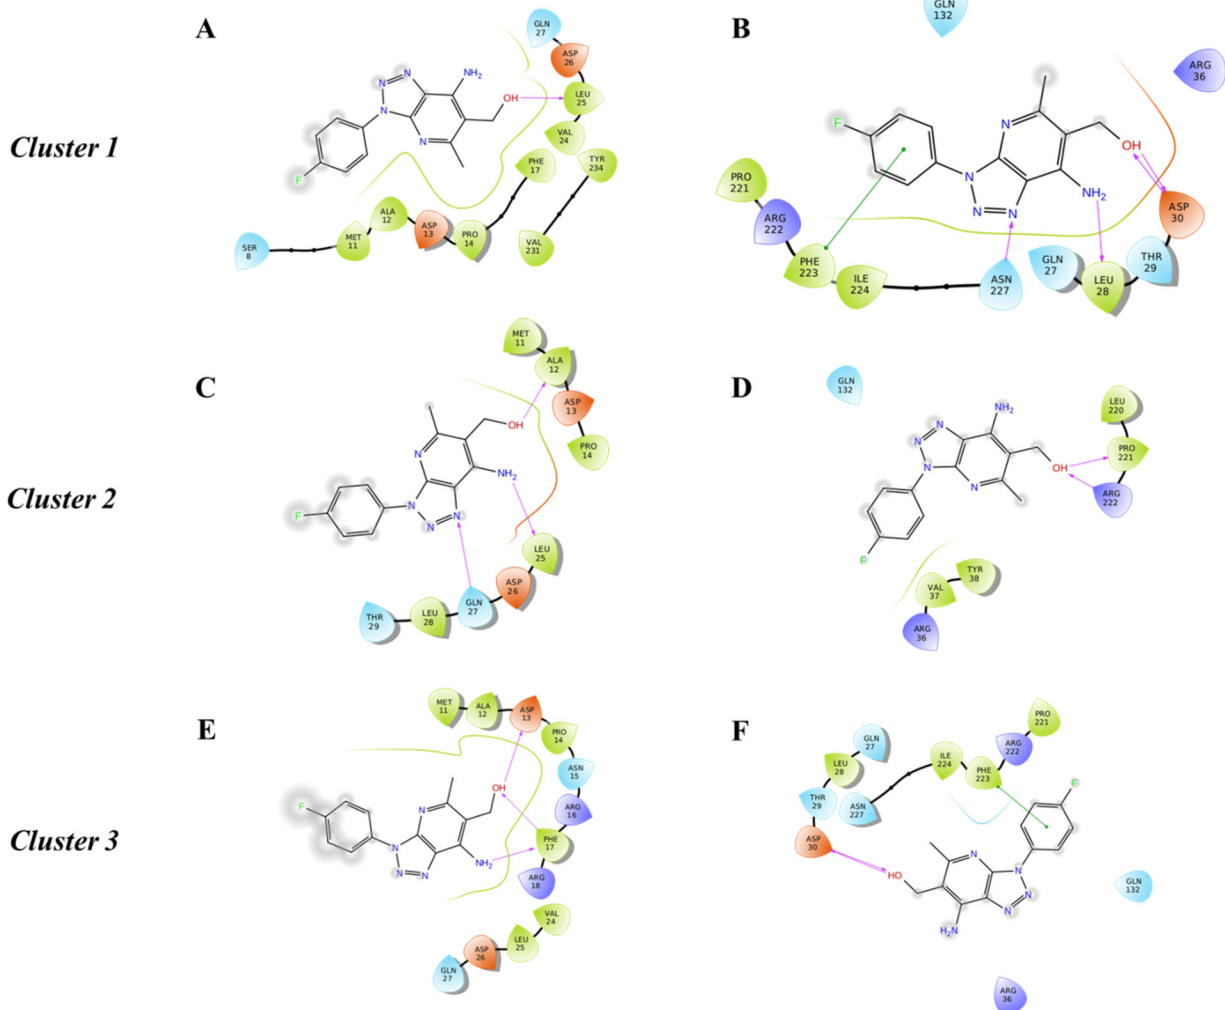

**Figure S8.** 2D Ligand Interaction diagram of **85** in complex to **A)** cluster 1, **C)** cluster 2, **E)** cluster 3 of gD-Pocket 1, and **85** in complex to **B)** cluster 1, **D)** cluster 2, **F)** cluster 3 of gD-Pocket 2.

## SMILES

|    |                                                                                   |
|----|-----------------------------------------------------------------------------------|
| 1  | <chem>CC(C4=C3N=C(C)C=C4)=NC1=C3N=NN1C2=CC=CC=C2</chem>                           |
| 2  | <chem>CC(C4=C3N=C(C5=CC=CC=C5)C=C4)=NC1=C3N=NN1C2=CC=CC=C2</chem>                 |
| 3  | <chem>CC(C4=C3N=C(C5=C(OC)C=CC=C5)C=C4)=NC1=C3N=NN1C2=CC=CC=C2</chem>             |
| 4  | <chem>CC(C4=C3N=C(C5=CC=C(OC)C=C5)C=C4)=NC1=C3N=NN1C2=CC=CC=C2</chem>             |
| 5  | <chem>CC(C4=C3N=C(C)C=C4)=NC1=C3N=NN1C2=CC=C(OC)C=C2</chem>                       |
| 6  | <chem>CC(C4=C3N=C(C5=CC=CC=C5)C=C4)=NC1=C3N=NN1C2=CC=C(OC)C=C2</chem>             |
| 7  | <chem>CC(C4=C3N=C(C5=C(OC)C=CC=C5)C=C4)=NC1=C3N=NN1C2=CC=C(OC)C=C2</chem>         |
| 8  | <chem>CC(C4=C3N=C(C5=CC=C(OC)C=C5)C=C4)=NC1=C3N=NN1C2=CC=C(OC)C=C2</chem>         |
| 9  | <chem>CC(C4=C3N=C(C)C=C4)=NC1=C3N=NN1C2=CC(OC)=C(OC)C(OC)=C2</chem>               |
| 10 | <chem>CC(C4=C3N=C(C5=CC=CC=C5)C=C4)=NC1=C3N=NN1C2=CC(OC)=C(OC)C(OC)=C2</chem>     |
| 11 | <chem>CC(C4=C3N=C(C5=C(OC)C=CC=C5)C=C4)=NC1=C3N=NN1C2=CC(OC)=C(OC)C(OC)=C2</chem> |
| 12 | <chem>CC(C4=C3N=C(C5=CC=C(OC)C=C5)C=C4)=NC1=C3N=NN1C2=CC(OC)=C(OC)C(OC)=C2</chem> |
| 13 | <chem>CC(C(C(OCC)=O)=C3N)=NC1=C3N=NN1C2=CC=CC=C2</chem>                           |
| 14 | <chem>CC(C(CO)=C3N)=NC1=C3N=NN1C2=CC=CC=C2</chem>                                 |
| 15 | <chem>CC(C(C(OCC)=O)=C3N)=NC1=C3N=NN1C2=CC=C(OC)C=C2</chem>                       |
| 16 | <chem>CC(C(CO)=C3N)=NC1=C3N=NN1C2=CC=C(OC)C=C2</chem>                             |
| 17 | <chem>CC(C(C(OCC)=O)=C3N)=NC1=C3N=NN1C2=CC(OC)=C(OC)C(OC)=C2</chem>               |
| 18 | <chem>CC(C(CO)=C3N)=NC1=C3N=NN1C2=CC(OC)=C(OC)C(OC)=C2</chem>                     |
| 19 | <chem>CC(C4=C3N=C(C5=C(F)C=CC=C5)C=C4)=NC1=C3N=NN1C2=CC=CC=C2</chem>              |
| 20 | <chem>CC(C4=C3N=C(C5=C(Br)C=CC=C5)C=C4)=NC1=C3N=NN1C2=CC=CC=C2</chem>             |
| 21 | <chem>CC(C4=C3N=C(C5=C(Cl)C=CC=C5)C=C4)=NC1=C3N=NN1C2=CC=CC=C2</chem>             |
| 22 | <chem>CC(C4=C3N=C(C5=C([N+][O-])=O)C=CC=C5)C=C4)=NC1=C3N=NN1C2=CC=CC=C2</chem>    |
| 23 | <chem>CC(C4=C3N=C(C5=C(N)C=CC=C5)C=C4)=NC1=C3N=NN1C2=CC=CC=C2</chem>              |
| 24 | <chem>CC(C4=C3N=C(C5=C(C(F)(F)F)C=CC=C5)C=C4)=NC1=C3N=NN1C2=CC=CC=C2</chem>       |
| 25 | <chem>CC(C4=C3N=C(C5=C(OC)C(OC)=CC=C5)C=C4)=NC1=C3N=NN1C2=CC=CC=C2</chem>         |
| 26 | <chem>CC(C4=C3N=C(C5=C(OC)C=C(OC)C=C5)C=C4)=NC1=C3N=NN1C2=CC=CC=C2</chem>         |
| 27 | <chem>CC(C4=C3N=C(C5=C(OC)C=CC(OC)=C5)C=C4)=NC1=C3N=NN1C2=CC=CC=C2</chem>         |
| 28 | <chem>CC(C4=C3N=C(C5=C(OC)C=CC(Cl)=C5)C=C4)=NC1=C3N=NN1C2=CC=CC=C2</chem>         |



|    |                                                                                              |
|----|----------------------------------------------------------------------------------------------|
| 29 | <chem>CC(C4=C3N=C(C5=C(OC)C=CC(Br)=C5)C=C4)=NC1=C3N=NN1C2=CC=CC=C2</chem>                    |
| 30 | <chem>CC(C4=C3N=C(C5=C(F)C=CC=C5)C=C4)=NC1=C3N=NN1C2=CC=C(OC)C=C2</chem>                     |
| 31 | <chem>CC(C4=C3N=C(C5=C(Br)C=CC=C5)C=C4)=NC1=C3N=NN1C2=CC=C(OC)C=C2</chem>                    |
| 32 | <chem>CC(C4=C3N=C(C5=C(Cl)C=CC=C5)C=C4)=NC1=C3N=NN1C2=CC=C(OC)C=C2</chem>                    |
| 33 | <chem>CC(C4=C3N=C(C5=C([N+])([O-])=O)C=CC=C5)C=C4)=NC1=C3N=NN1C2=CC=C(OC)C=C2</chem>         |
| 34 | <chem>CC(C4=C3N=C(C5=C(N)C=CC=C5)C=C4)=NC1=C3N=NN1C2=CC=C(OC)C=C2</chem>                     |
| 35 | <chem>CC(C4=C3N=C(C5=C(C(F)(F)F)C=CC=C5)C=C4)=NC1=C3N=NN1C2=CC=C(OC)C=C2</chem>              |
| 36 | <chem>CC(C4=C3N=C(C5=C(OC)C(OC)=CC=C5)C=C4)=NC1=C3N=NN1C2=CC=C(OC)C=C2</chem>                |
| 37 | <chem>CC(C4=C3N=C(C5=C(OC)C=C(OC)C=C5)C=C4)=NC1=C3N=NN1C2=CC=C(OC)C=C2</chem>                |
| 38 | <chem>CC(C4=C3N=C(C5=C(OC)C=CC(OC)=C5)C=C4)=NC1=C3N=NN1C2=CC=C(OC)C=C2</chem>                |
| 39 | <chem>CC(C4=C3N=C(C5=C(OC)C=CC(Cl)=C5)C=C4)=NC1=C3N=NN1C2=CC=C(OC)C=C2</chem>                |
| 40 | <chem>CC(C4=C3N=C(C5=C(OC)C=CC(Br)=C5)C=C4)=NC1=C3N=NN1C2=CC=C(OC)C=C2</chem>                |
| 41 | <chem>CC(C4=C3N=C(C5=C(F)C=CC=C5)C=C4)=NC1=C3N=NN1C2=CC(OC)=C(OC)C(OC)=C2</chem>             |
| 42 | <chem>CC(C4=C3N=C(C5=C(Br)C=CC=C5)C=C4)=NC1=C3N=NN1C2=CC(OC)=C(OC)C(OC)=C2</chem>            |
| 43 | <chem>CC(C4=C3N=C(C5=C(Cl)C=CC=C5)C=C4)=NC1=C3N=NN1C2=CC(OC)=C(OC)C(OC)=C2</chem>            |
| 44 | <chem>CC(C4=C3N=C(C5=C([N+])([O-])=O)C=CC=C5)C=C4)=NC1=C3N=NN1C2=CC(OC)=C(OC)C(OC)=C2</chem> |
| 45 | <chem>CC(C4=C3N=C(C5=C(N)C=CC=C5)C=C4)=NC1=C3N=NN1C2=CC(OC)=C(OC)C(OC)=C2</chem>             |
| 46 | <chem>CC(C4=C3N=C(C5=C(C(F)(F)F)C=CC=C5)C=C4)=NC1=C3N=NN1C2=CC(OC)=C(OC)C(OC)=C2</chem>      |
| 47 | <chem>CC(C4=C3N=C(C5=C(OC)C(OC)=CC=C5)C=C4)=NC1=C3N=NN1C2=CC(OC)=C(OC)C(OC)=C2</chem>        |
| 48 | <chem>CC(C4=C3N=C(C5=C(OC)C=C(OC)C=C5)C=C4)=NC1=C3N=NN1C2=CC(OC)=C(OC)C(OC)=C2</chem>        |
| 49 | <chem>CC(C4=C3N=C(C5=C(OC)C=CC(OC)=C5)C=C4)=NC1=C3N=NN1C2=CC(OC)=C(OC)C(OC)=C2</chem>        |
| 50 | <chem>CC(C4=C3N=C(C5=C(OC)C=CC(Cl)=C5)C=C4)=NC1=C3N=NN1C2=CC(OC)=C(OC)C(OC)=C2</chem>        |
| 51 | <chem>CC(C4=C3N=C(C5=C(OC)C=CC(Br)=C5)C=C4)=NC1=C3N=NN1C2=CC(OC)=C(OC)C(OC)=C2</chem>        |
| 52 | <chem>CC(C4=C3N=C(C5=CC=C(OC)C=C5)C=C4)=NC1=C3N=NN1C2=CC=C(Cl)C=C2</chem>                    |
| 53 | <chem>CC(C4=C3N=C(C)C=C4)=NC1=C3N=NN1C2=CC=C(Cl)C=C2</chem>                                  |
| 54 | <chem>CC(C4=C3N=C(C5=CC=CC=C5)C=C4)=NC1=C3N=NN1C2=CC=C(Cl)C=C2</chem>                        |
| 55 | <chem>CC(C4=C3N=C(C5=C(OC)C=CC=C5)C=C4)=NC1=C3N=NN1C2=CC=C(Cl)C=C2</chem>                    |
| 56 | <chem>CC(C4=C3N=C(C5=C(F)C=CC=C5)C=C4)=NC1=C3N=NN1C2=CC=C(Cl)C=C2</chem>                     |
| 57 | <chem>CC(C4=C3N=C(C5=C(Br)C=CC=C5)C=C4)=NC1=C3N=NN1C2=CC=C(Cl)C=C2</chem>                    |
| 58 | <chem>CC(C4=C3N=C(C5=C(Cl)C=CC=C5)C=C4)=NC1=C3N=NN1C2=CC=C(Cl)C=C2</chem>                    |

|    |                                                                                    |
|----|------------------------------------------------------------------------------------|
| 59 | <chem>CC(C4=C3N=C(C5=C([N+][O-])=O)C=CC=C5)C=C4)=NC1=C3N=NN1C2=CC=C(Cl)C=C2</chem> |
| 60 | <chem>CC(C4=C3N=C(C5=C(N)C=CC=C5)C=C4)=NC1=C3N=NN1C2=CC=C(Cl)C=C2</chem>           |
| 61 | <chem>CC(C4=C3N=C(C5=C(C(F)(F)F)C=CC=C5)C=C4)=NC1=C3N=NN1C2=CC=C(Cl)C=C2</chem>    |
| 62 | <chem>CC(C4=C3N=C(C5=C(OC)C(OC)=CC=C5)C=C4)=NC1=C3N=NN1C2=CC=C(Cl)C=C2</chem>      |
| 63 | <chem>CC(C4=C3N=C(C5=C(OC)C=C(OC)C=C5)C=C4)=NC1=C3N=NN1C2=CC=C(Cl)C=C2</chem>      |
| 64 | <chem>CC(C4=C3N=C(C5=C(OC)C=CC(OC)=C5)C=C4)=NC1=C3N=NN1C2=CC=C(Cl)C=C2</chem>      |
| 65 | <chem>CC(C4=C3N=C(C5=C(OC)C=CC(Cl)=C5)C=C4)=NC1=C3N=NN1C2=CC=C(Cl)C=C2</chem>      |
| 66 | <chem>CC(C4=C3N=C(C5=C(OC)C=CC(Br)=C5)C=C4)=NC1=C3N=NN1C2=CC=C(Cl)C=C2</chem>      |
| 67 | <chem>CC(C4=C3N=C(C5=CC=C(OC)C=C5)C=C4)=NC1=C3N=NN1C2=CC=C(F)C=C2</chem>           |
| 68 | <chem>CC(C4=C3N=C(C)C=C4)=NC1=C3N=NN1C2=CC=C(F)C=C2</chem>                         |
| 69 | <chem>CC(C4=C3N=C(C5=CC=CC=C5)C=C4)=NC1=C3N=NN1C2=CC=C(F)C=C2</chem>               |
| 70 | <chem>CC(C4=C3N=C(C5=C(OC)C=CC=C5)C=C4)=NC1=C3N=NN1C2=CC=C(F)C=C2</chem>           |
| 71 | <chem>CC(C4=C3N=C(C5=C(F)C=CC=C5)C=C4)=NC1=C3N=NN1C2=CC=C(F)C=C2</chem>            |
| 72 | <chem>CC(C4=C3N=C(C5=C(Br)C=CC=C5)C=C4)=NC1=C3N=NN1C2=CC=C(F)C=C2</chem>           |
| 73 | <chem>CC(C4=C3N=C(C5=C(Cl)C=CC=C5)C=C4)=NC1=C3N=NN1C2=CC=C(F)C=C2</chem>           |
| 74 | <chem>CC(C4=C3N=C(C5=C([N+][O-])=O)C=CC=C5)C=C4)=NC1=C3N=NN1C2=CC=C(F)C=C2</chem>  |
| 75 | <chem>CC(C4=C3N=C(C5=C(N)C=CC=C5)C=C4)=NC1=C3N=NN1C2=CC=C(F)C=C2</chem>            |
| 76 | <chem>CC(C4=C3N=C(C5=C(C(F)(F)F)C=CC=C5)C=C4)=NC1=C3N=NN1C2=CC=C(F)C=C2</chem>     |
| 77 | <chem>CC(C4=C3N=C(C5=C(OC)C(OC)=CC=C5)C=C4)=NC1=C3N=NN1C2=CC=C(F)C=C2</chem>       |
| 78 | <chem>CC(C4=C3N=C(C5=C(OC)C=C(OC)C=C5)C=C4)=NC1=C3N=NN1C2=CC=C(F)C=C2</chem>       |
| 79 | <chem>CC(C4=C3N=C(C5=C(OC)C=CC(OC)=C5)C=C4)=NC1=C3N=NN1C2=CC=C(F)C=C2</chem>       |
| 80 | <chem>CC(C4=C3N=C(C5=C(OC)C=CC(Cl)=C5)C=C4)=NC1=C3N=NN1C2=CC=C(F)C=C2</chem>       |
| 81 | <chem>CC(C4=C3N=C(C5=C(OC)C=CC(Br)=C5)C=C4)=NC1=C3N=NN1C2=CC=C(F)C=C2</chem>       |
| 82 | <chem>CC(C(C(OCC)=O)=C3N)=NC1=C3N=NN1C2=CC=C(Cl)C=C2</chem>                        |
| 83 | <chem>CC(C(CO)=C3N)=NC1=C3N=NN1C2=CC=C(Cl)C=C2</chem>                              |
| 84 | <chem>CC(C(C(OCC)=O)=C3N)=NC1=C3N=NN1C2=CC=C(F)C=C2</chem>                         |
| 85 | <chem>CC(C(CO)=C3N)=NC1=C3N=NN1C2=CC=C(F)C=C2</chem>                               |
